# Supplementary material for: A Conserved Developmental Patterning Network Produces Quantitatively Different Output in Multiple Species of Drosophila
Source: PubMed Central journal article supplement (PMC3203197; doi:10.1371/journal.pgen.1002346), 2011-10-27

# Expression distance scored for hb alone

## Dmel-Dyak

Nearest cell

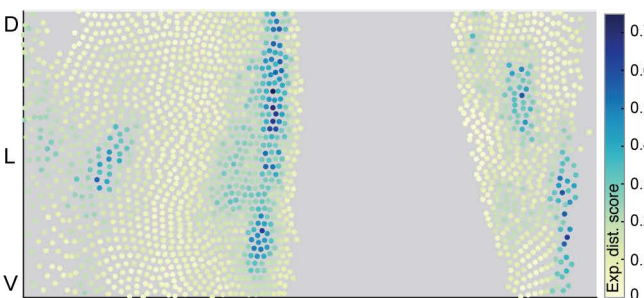

## Dmel-Dpse

Nearest cell

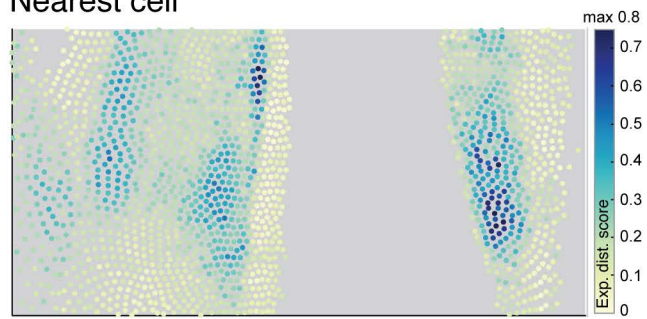

Best cell in local search

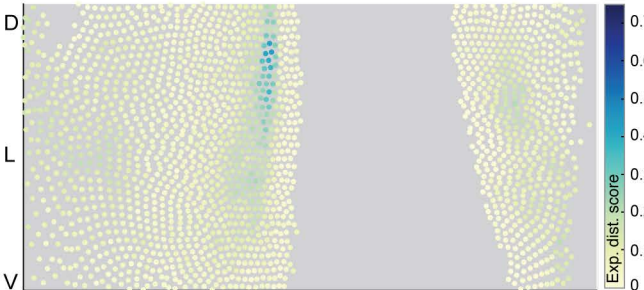

Best cell in local search

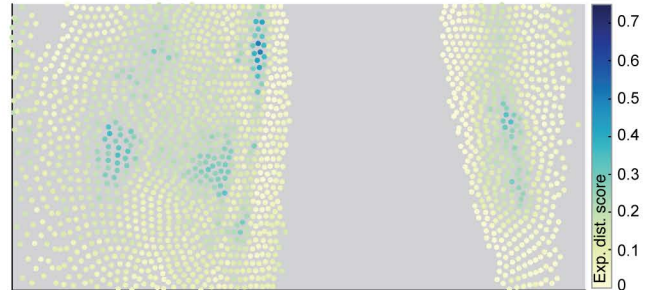

Direction to best cells in local search

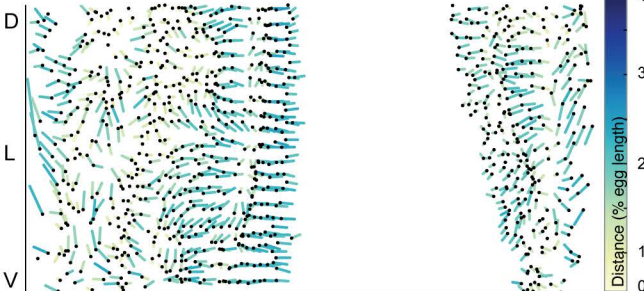

Direction to best cells in local search

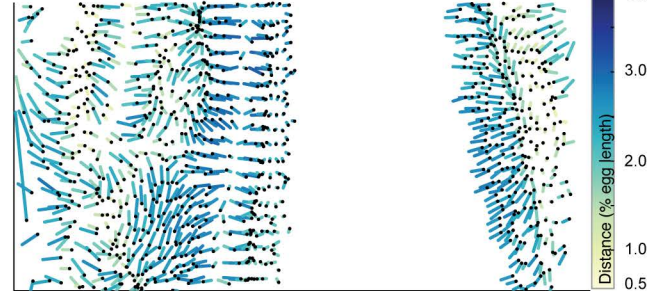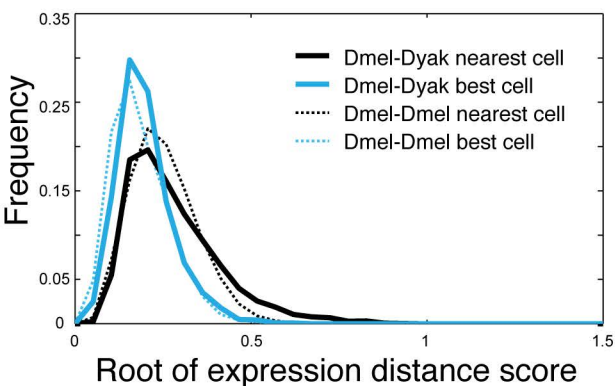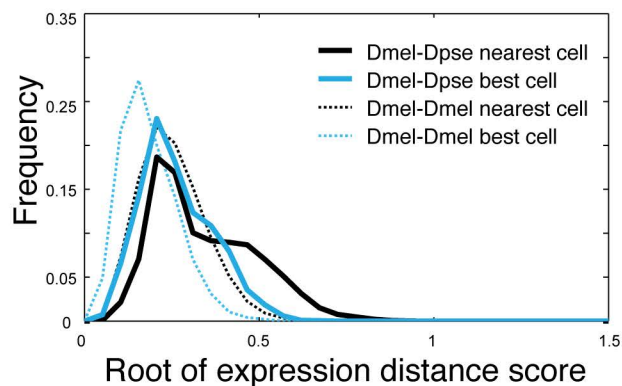

# Expression distance scored for gt alone

## Dmel-Dyak

Nearest cell

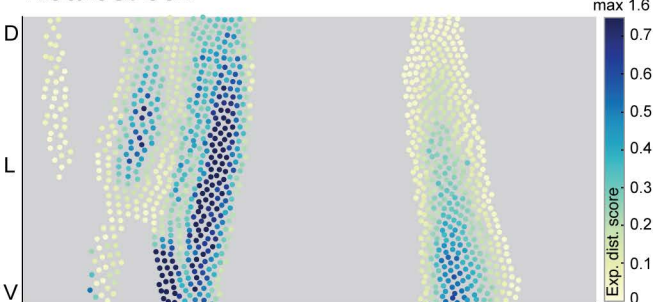

## Dmel-Dpse

Nearest cell

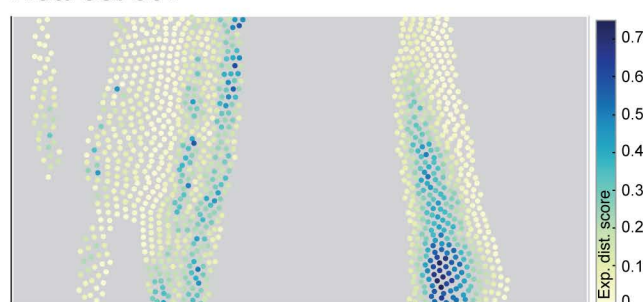

Best cell in local search

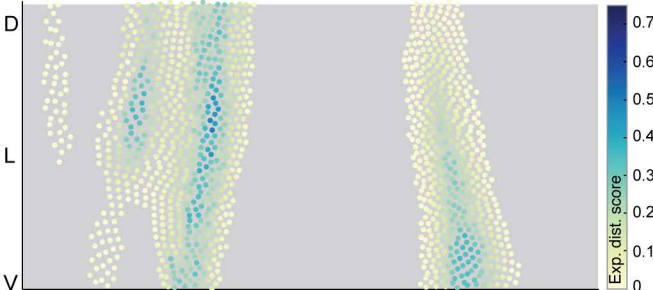

Best cell in local search

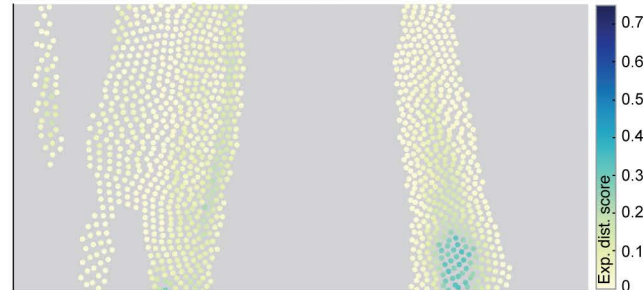

Direction to best cells in local search

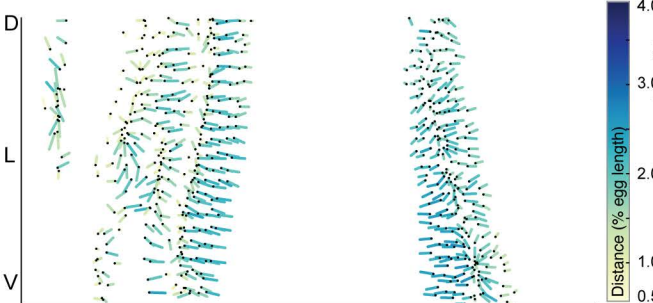

Direction to best cells in local search

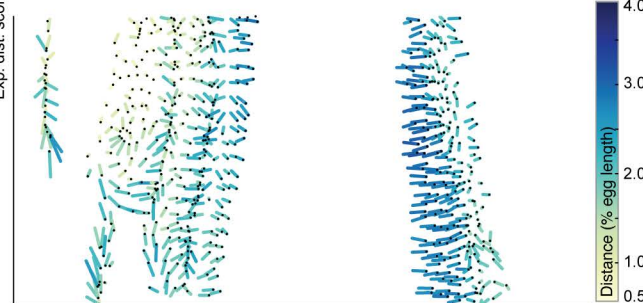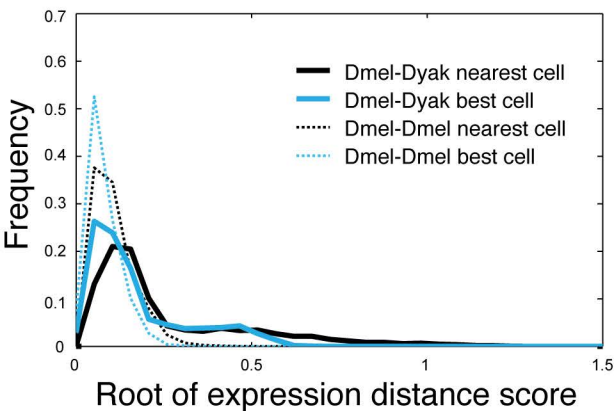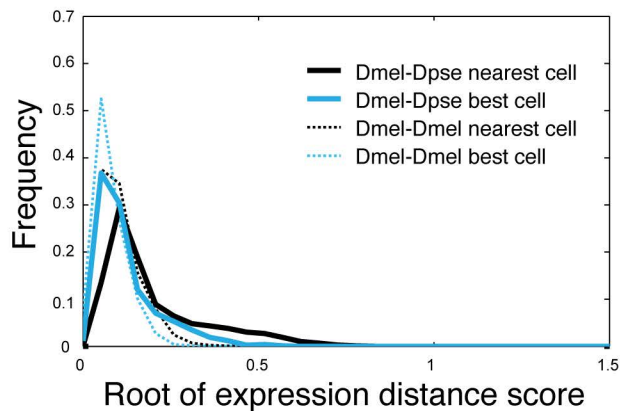

# Expression distance scored for Kr alone

## Dmel-Dyak

### Nearest cell

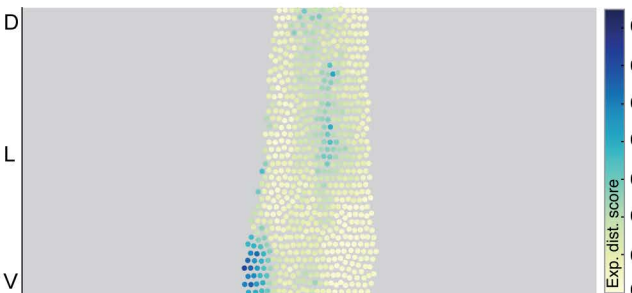

## Dmel-Dpse

### Nearest cell

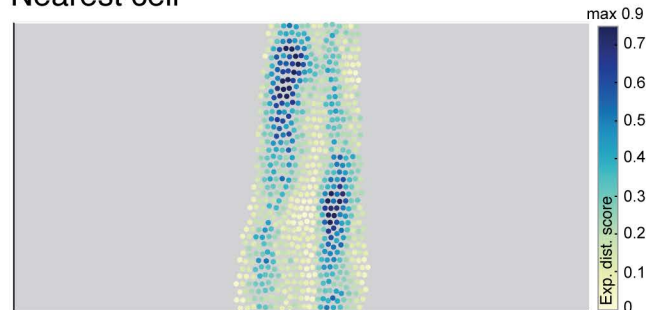

### Best cell in local search

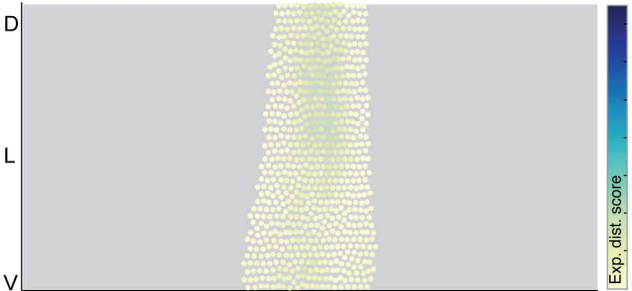

### Best cell in local search

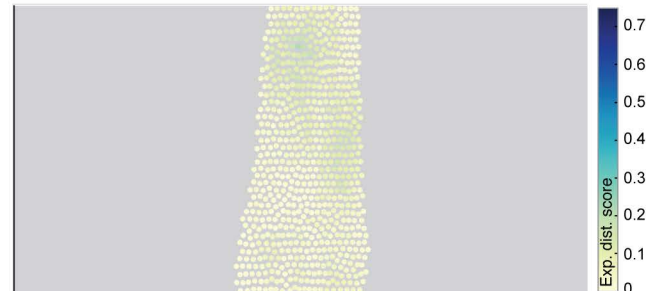

### Direction to best cells in local search

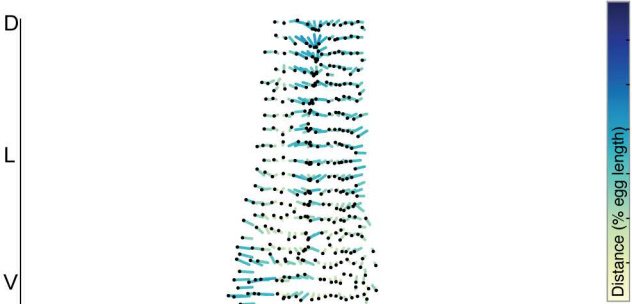

### Direction to best cells in local search

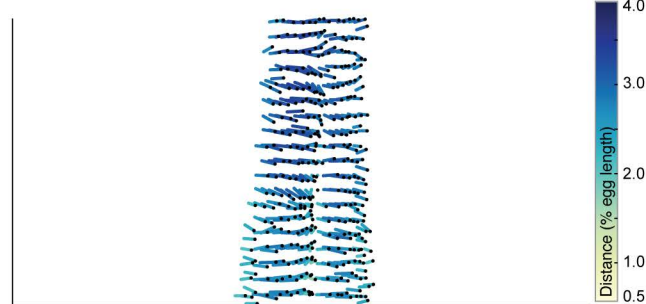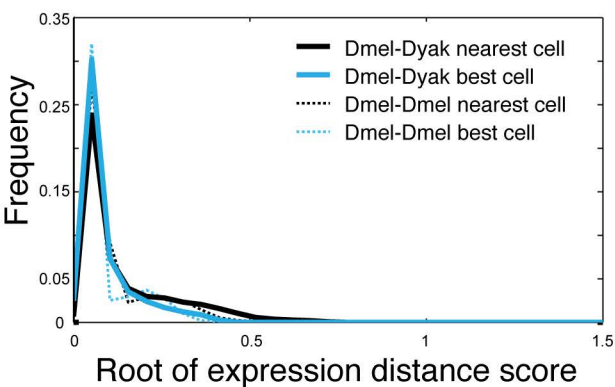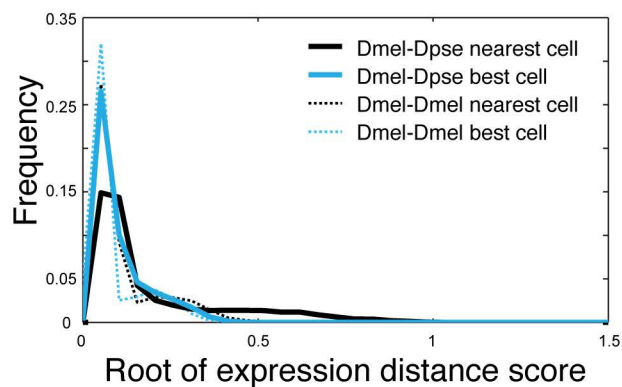



# Expression distance scored for kni alone

## Dmel-Dyak

### Nearest cell

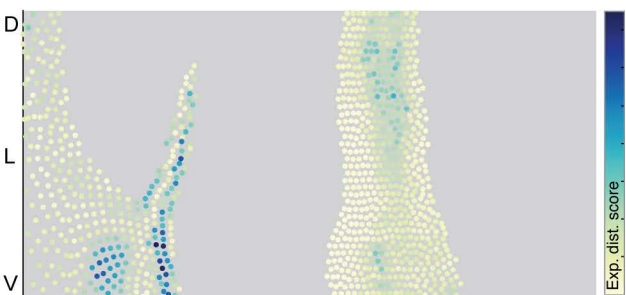

## Dmel-Dpse

### Nearest cell

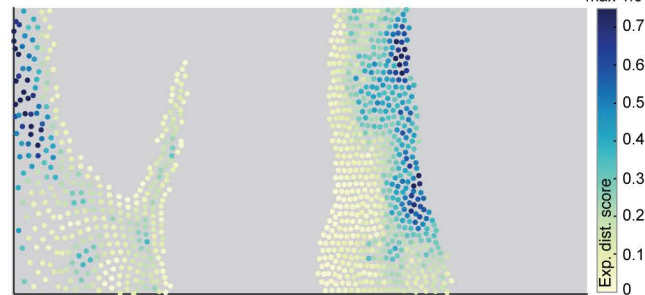

### Best cell in local search

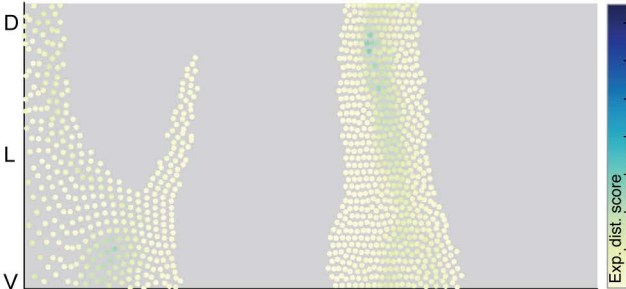

### Best cell in local search

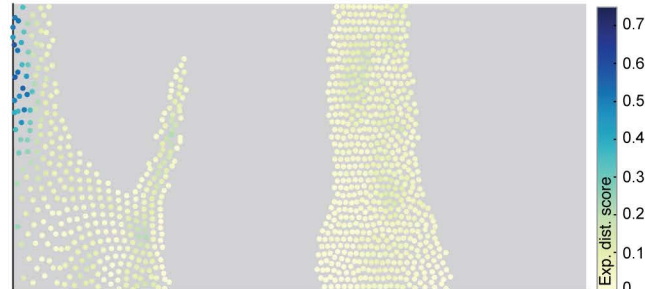

### Direction to best cells in local search

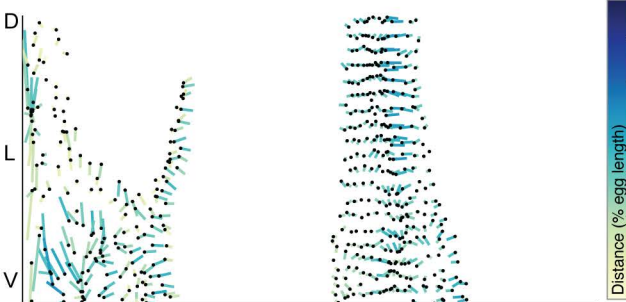

### Direction to best cells in local search

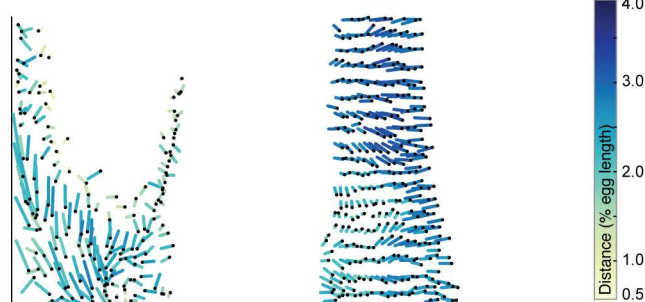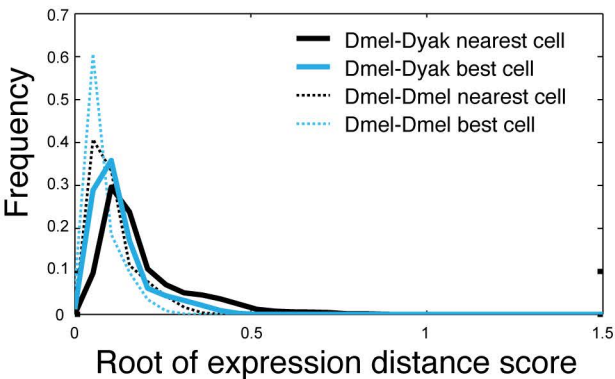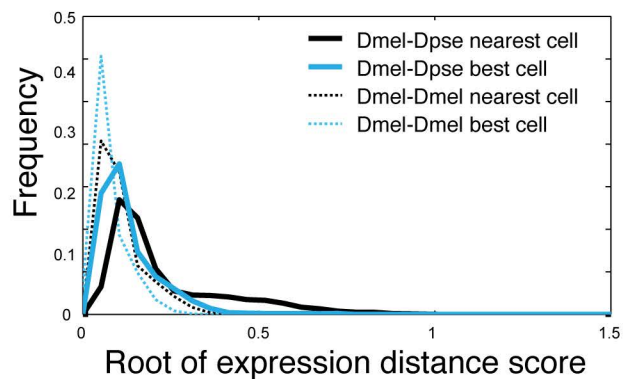

# Expression distance scored for fkh alone

## Dmel-Dyak

Nearest cell

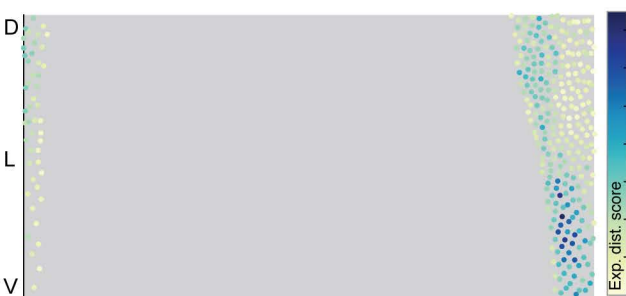

## Dmel-Dpse

Nearest cell

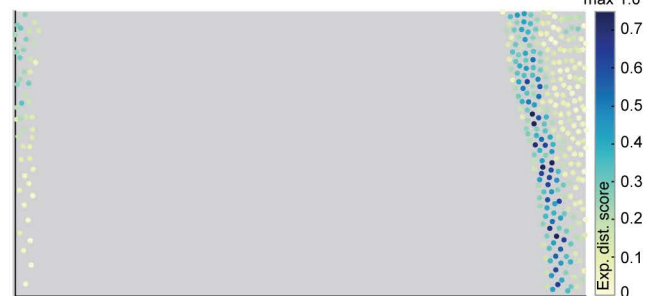

Best cell in local search

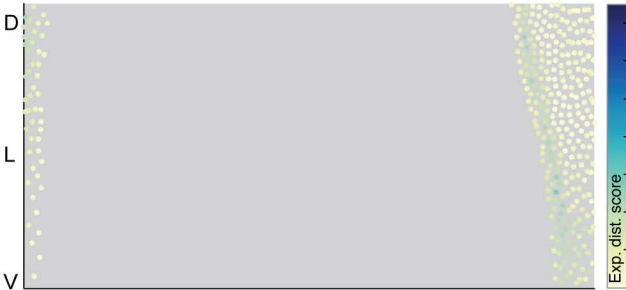

Best cell in local search

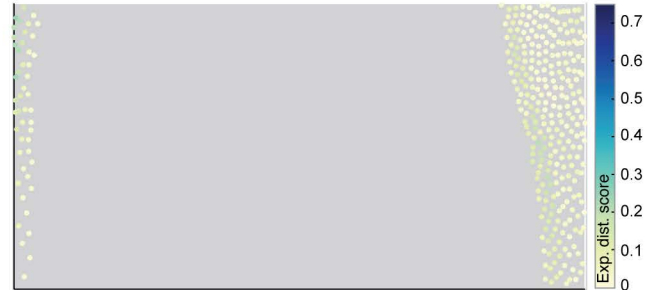

Direction to best cells in local search

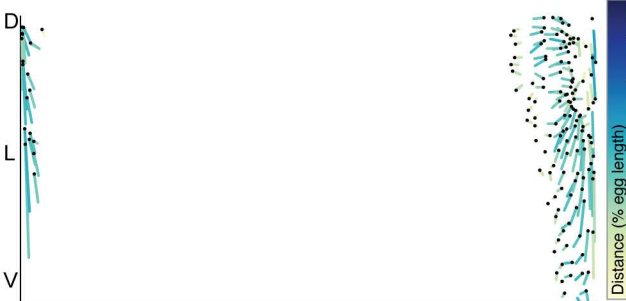

Direction to best cells in local search

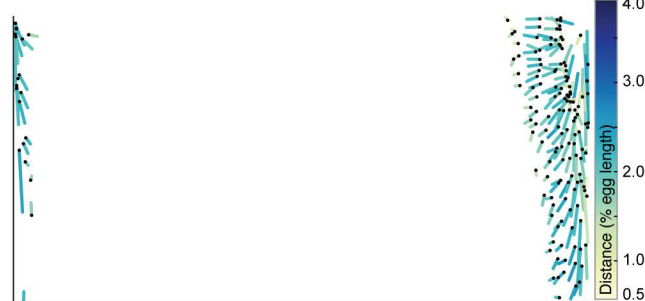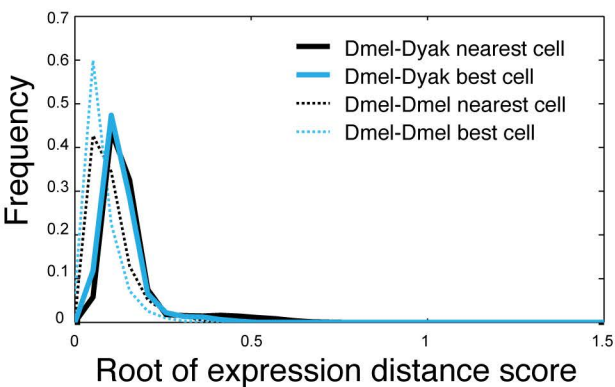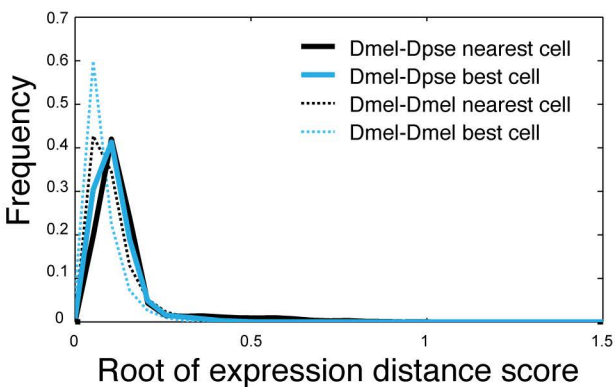

# Expression distance scored for fkh alone

## Dmel-Dyak

Nearest cell

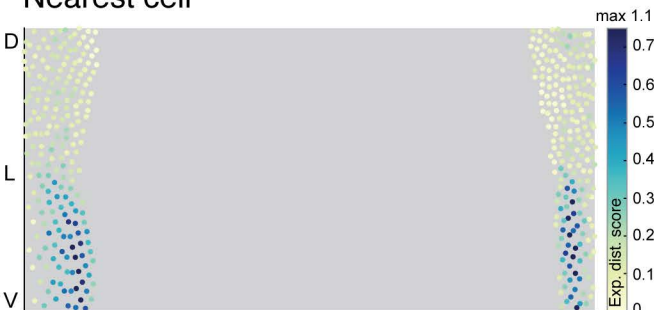

## Dmel-Dpse

Nearest cell

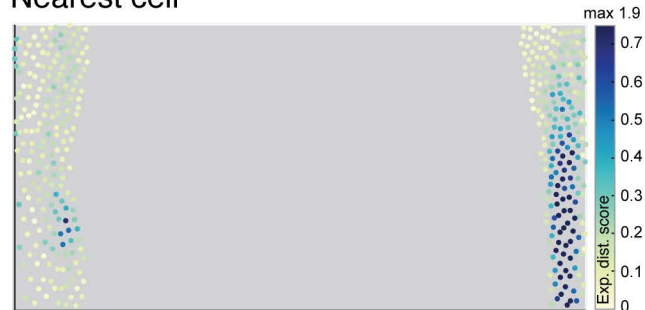

Best cell in local search

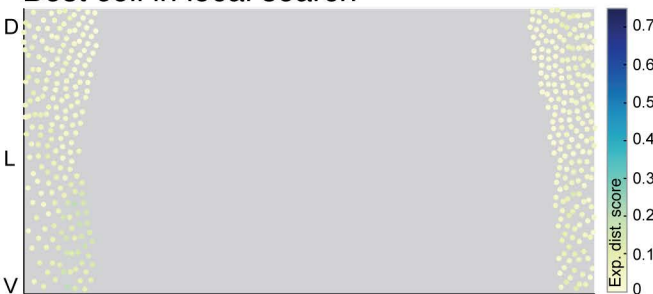

Best cell in local search

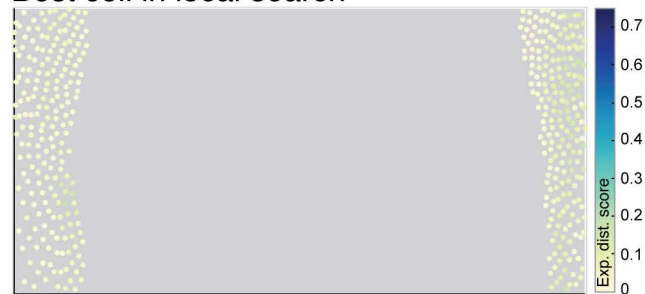

Direction to best cells in local search

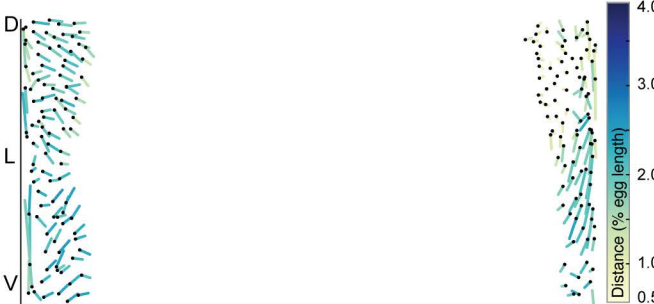

Direction to best cells in local search

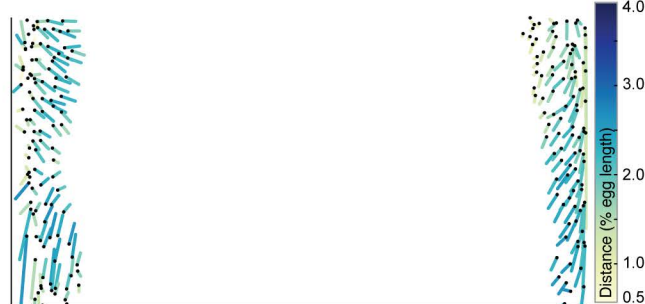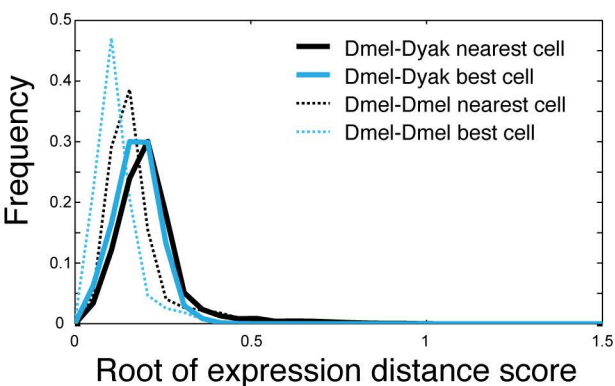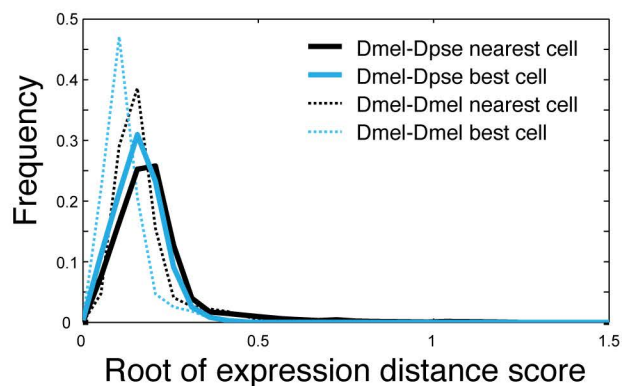

# Expression distance scored for tll alone

## Dmel-Dyak

Nearest cell

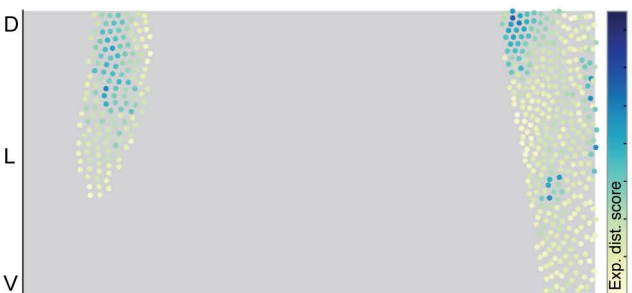

## Dmel-Dpse

Nearest cell

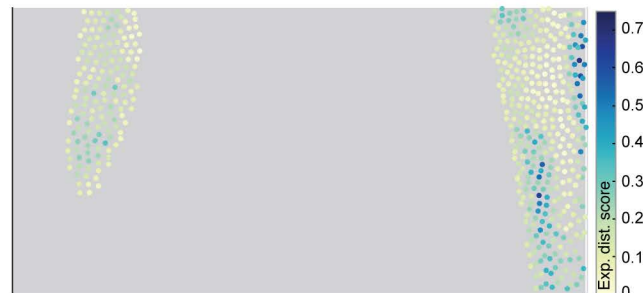

Best cell in local search

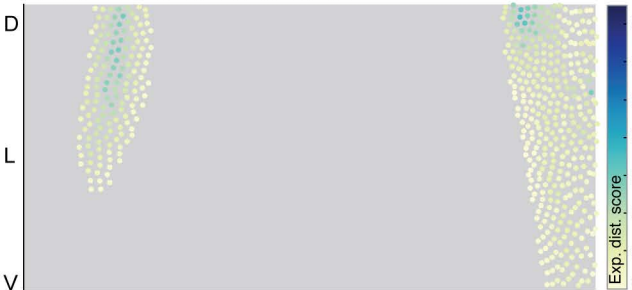

Best cell in local search

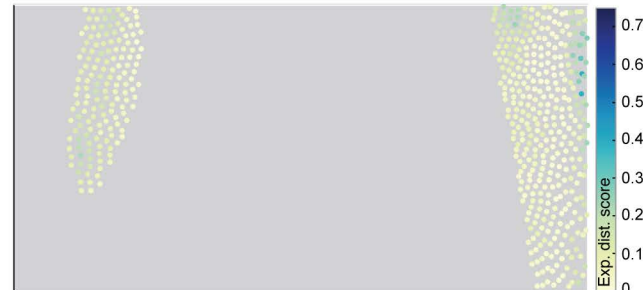

Direction to best cells in local search

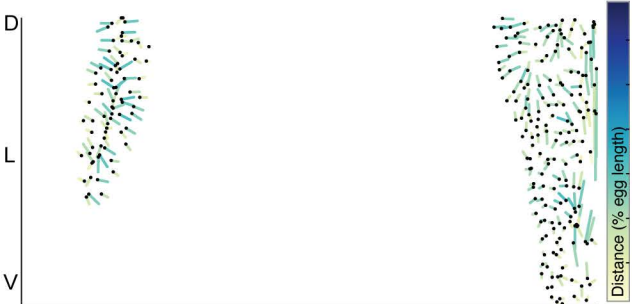

Direction to best cells in local search

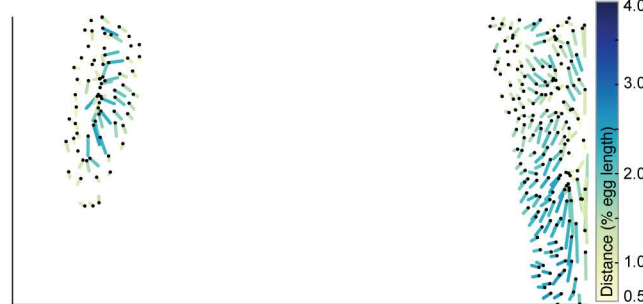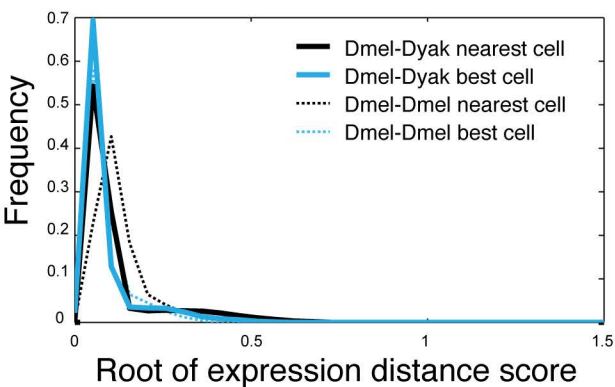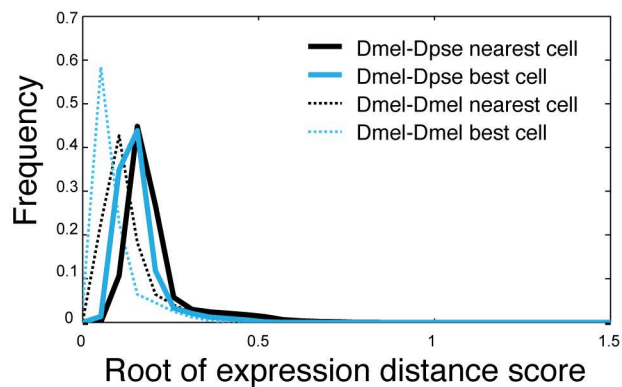



# Expression distance scored for ftz alone

## Dmel-Dyak

Nearest cell

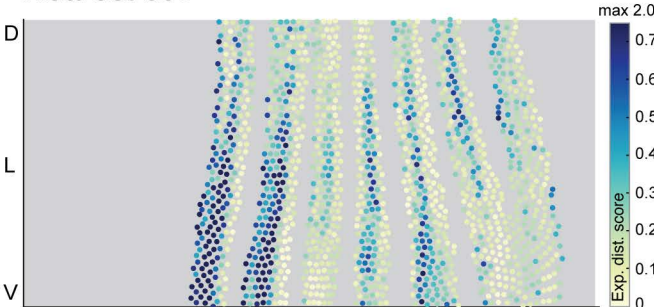

## Dmel-Dpse

Nearest cell

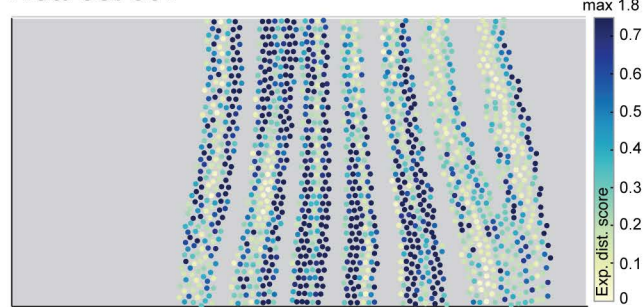

Best cell in local search

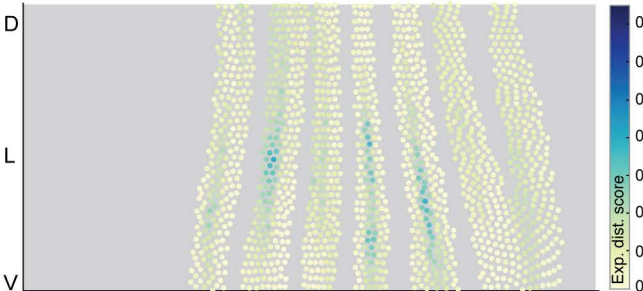

Best cell in local search

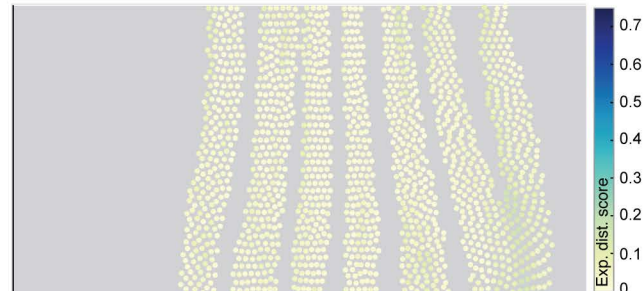

Direction to best cells in local search

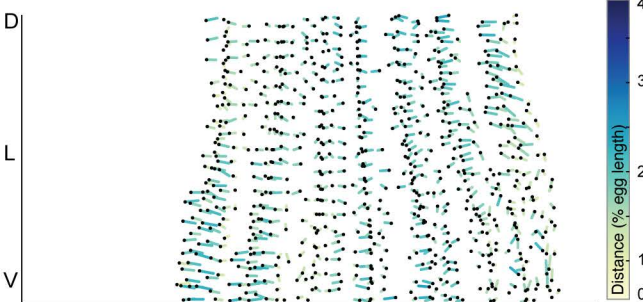

Direction to best cells in local search

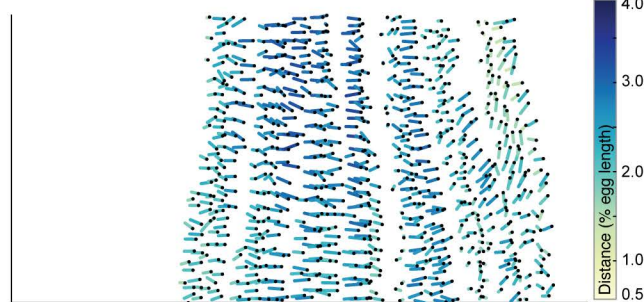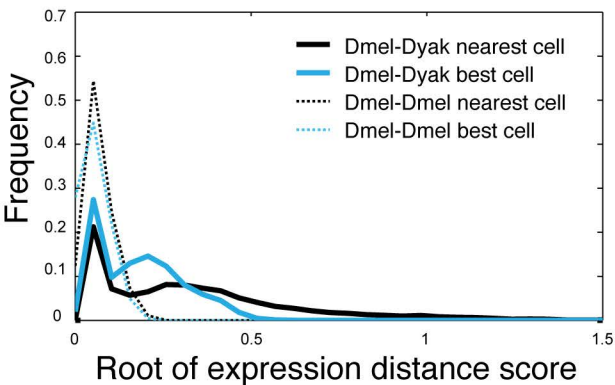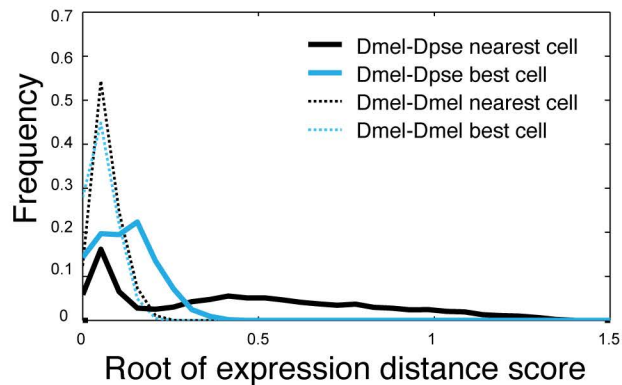



# Expression distance scored for odd alone

## Dmel-Dyak

### Nearest cell

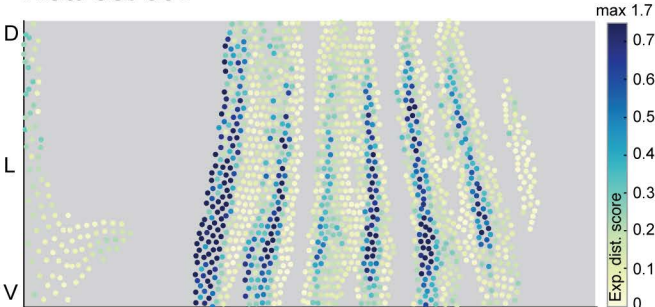

## Dmel-Dpse

### Nearest cell

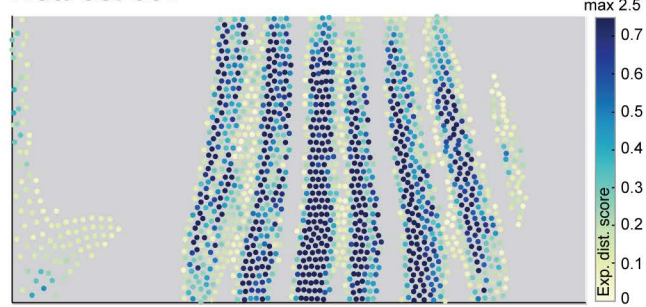

### Best cell in local search

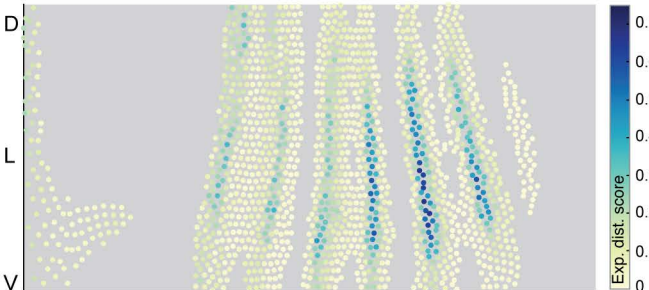

### Best cell in local search

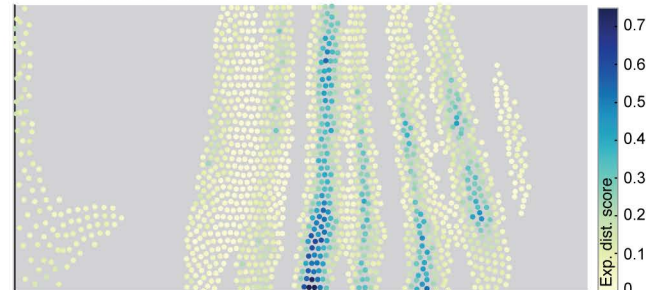

### Direction to best cells in local search

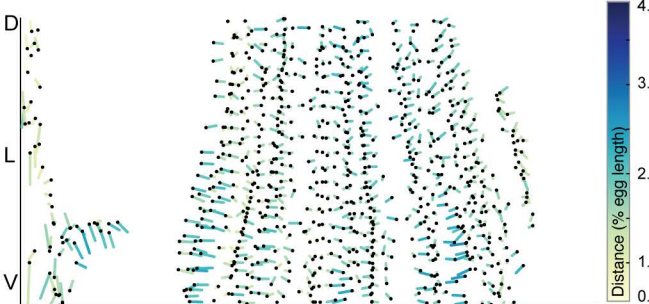

### Direction to best cells in local search

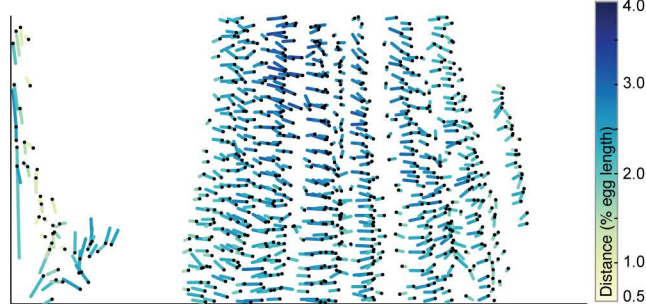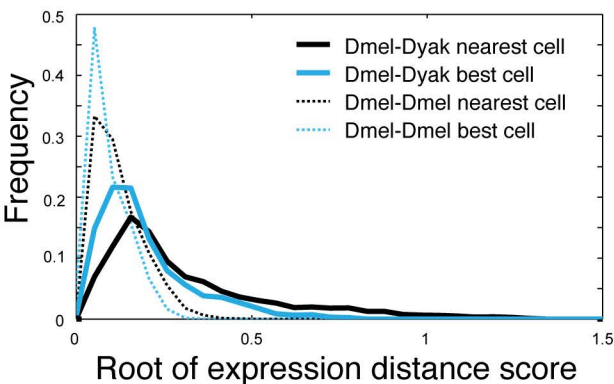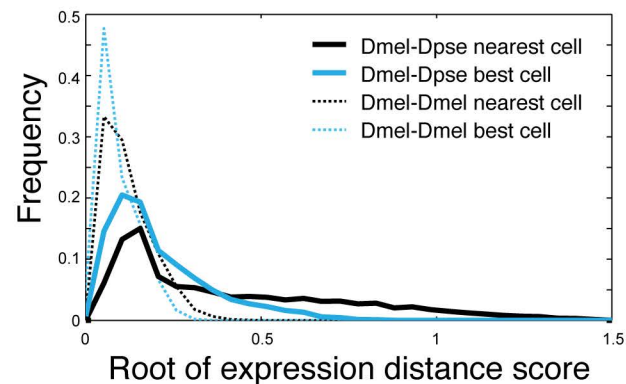

# Expression distance scored for prd alone

## Dmel-Dyak

Nearest cell

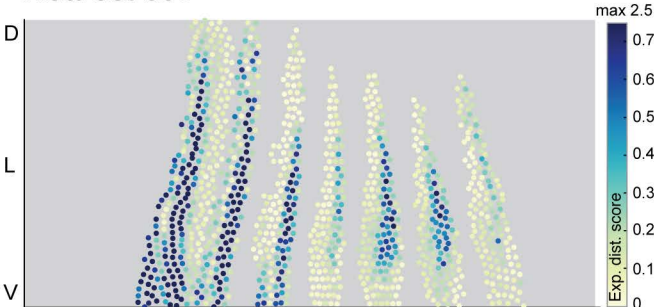

## Dmel-Dpse

Nearest cell

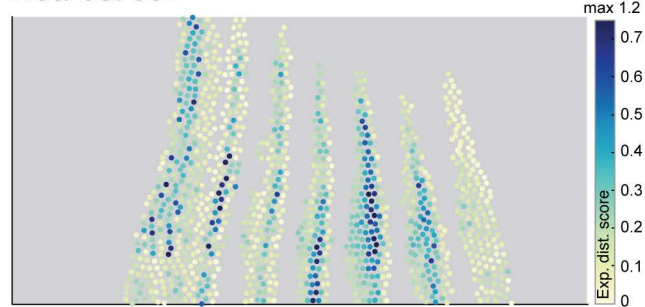

Best cell in local search

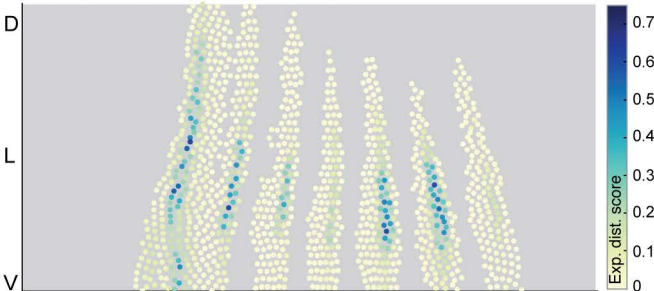

Best cell in local search

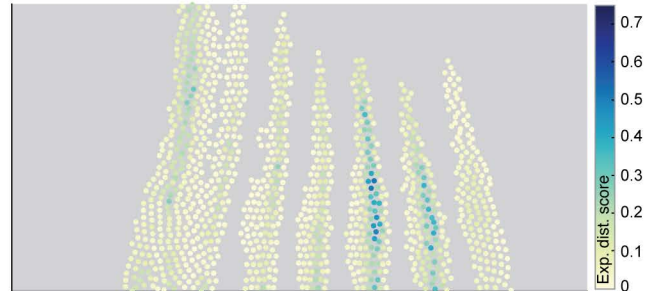

Direction to best cells in local search

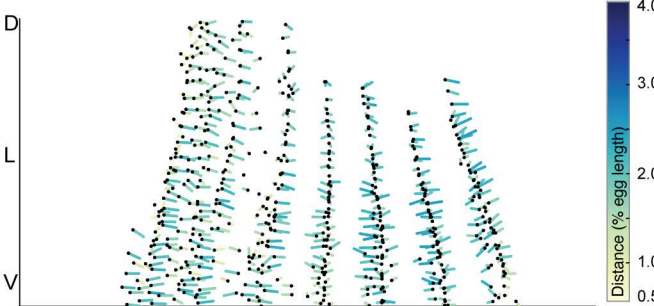

Direction to best cells in local search

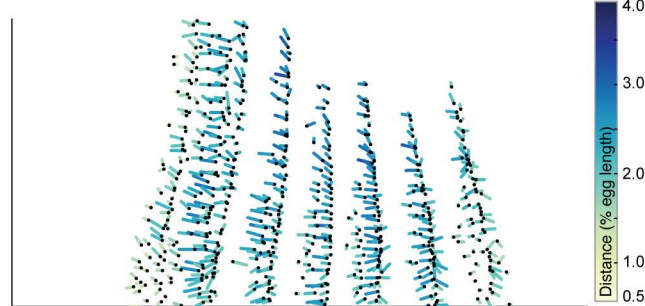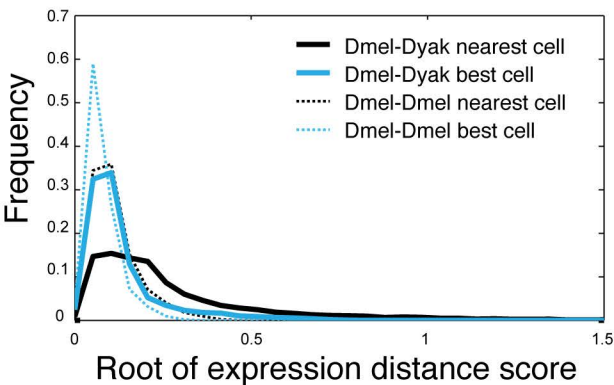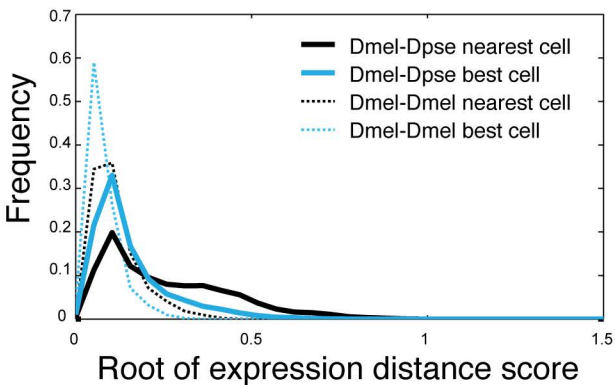

Supplement: pgen.1002346.s004.pdf [file pgen.1002346.s004.pdf]
